# Supplementary material for: Jasmonates—the Master Regulator of Rice Development, Adaptation and Defense
Source: PubMed Central journal article supplement (PMC6784130; doi:10.3390/plants8090339), 2019-09-09
Supplement: plants-08-00339-s001.pdf [file plants-08-00339-s001.pdf]

**Table S1.** Mutant and transgenic plants in jasmonates biosynthesis and signaling in rice

| Gene name         | Name of mutant/transgenic lines                                     | RAP ID              | Function                                                                                                                                                                                                                                                                                                                                                                                                                                                                                                                                                           | Reference        |
|-------------------|---------------------------------------------------------------------|---------------------|--------------------------------------------------------------------------------------------------------------------------------------------------------------------------------------------------------------------------------------------------------------------------------------------------------------------------------------------------------------------------------------------------------------------------------------------------------------------------------------------------------------------------------------------------------------------|------------------|
| <i>OsHI-LOX</i>   | <i>oshiloxRNAi</i>                                                  | Os08g0508800        | <b>JA biosynthesis</b><br>Increases susceptibility to chewing herbivores, but enhances resistance to a phloem feeder when silenced.                                                                                                                                                                                                                                                                                                                                                                                                                                | [62]             |
| <i>OsAOS1</i>     | <i>pre/cpm1</i><br>( <i>precocious/coleoptile morphogenesis 1</i> ) | Os03g0767000        | <b>JA biosynthesis</b><br>The <i>pre/cpm1</i> plant has long leaves and elongated coleoptiles and mesocotyls, flowers approximately 5 days earlier with the flowers remaining open after flowering, and is partially sterile.                                                                                                                                                                                                                                                                                                                                      | [32,33]          |
| <i>OsAOC</i>      | <i>cpm2/hebibia</i><br>( <i>coleoptile morphogenesis 2</i> )        | Os03g0438100        | <b>JA biosynthesis</b><br>The mutation in the <i>OsAOC</i> gene produces abnormalities in the spikelet architecture with elongated palea, sterile lemmas, additional bract-like organs, additional anthers and pistils, an early heading time, and elongated coleoptiles and mesocotyls.<br>Increases susceptibility to <i>Magnaporthe grisea</i> , the root-knot nematode <i>Meiloidogyne graminicola</i> , the parasitic plant <i>Striga hermonthica</i> , and the generalist cucumber beetle <i>Diabrotica balteata</i><br>Enhances drought and salt tolerance. | [29,30,60,70,76] |
| <i>OsOPR7</i>     | <i>og1/ucgl</i><br>( <i>open glume 1/unclose glume</i> )            | Os08g0459600        | <b>JA biosynthesis</b><br>The mutation in <i>OsOPR7</i> results in the lemma and palea not being able to fully close during anthesis and malformed, shriveled, and mildewed seeds within open glumes.                                                                                                                                                                                                                                                                                                                                                              | [34,35]          |
| <i>OsJAR1</i>     | <i>osjar1</i>                                                       | Os05g0586200        | <b>Catalyzes the conjugation of JA and an amino acid</b><br>Loss of function of <i>OsJAR1</i> and defects in husk closure and anther dehiscence.                                                                                                                                                                                                                                                                                                                                                                                                                   | [36]             |
| <i>OsCYP94C2b</i> | <i>CYP94C2b_OE</i>                                                  | <i>Os12g0150200</i> | <b>Catalyzes the conversion of JA-Ile into 12-OH-JA-Ile and 12-COOH-JA-Ile</b><br>Increases salt tolerance and increases internode length and plant height under normal conditions when overexpressed.                                                                                                                                                                                                                                                                                                                                                             | [106,107]        |
| <i>OsJAZ1</i>     | <i>eg2</i><br>( <i>extra glume 2</i> )                              | Os04g0653000        | <b>Repressor in JA signaling</b><br>Increases floret number, culm length, and grain weight; reduces heading time and spikelet fertility; and enhances root growth when overexpressed.<br>Produces extra glume-like structures, alters floral organ numbers and identities, and increases root length when mutated.                                                                                                                                                                                                                                                 | [31,45,46]       |

|                |                                     |              |                                                                                                                                                                                                                                                                                                                                                |             |
|----------------|-------------------------------------|--------------|------------------------------------------------------------------------------------------------------------------------------------------------------------------------------------------------------------------------------------------------------------------------------------------------------------------------------------------------|-------------|
| <i>OsJAZ3</i>  | <i>OsJAZ3_OE</i>                    | Os08g0428400 | <b>Repressor in JA signaling</b><br>Increased number of organs in florets, aberrant patterns of organ formation, and repetitious organ production in spikelets when overexpressed in the dominant negative form.                                                                                                                               | [44]        |
| <i>OsJAZ5</i>  | <i>OsJAZ5_OE</i>                    | Os04g0395800 | <b>Repressor in JA signaling</b><br>Increased floret number, culm length, and grain weight and reduced heading time and spikelet fertility when overexpressed.                                                                                                                                                                                 | [45]        |
| <i>OsJAZ6</i>  | <i>OsJAZ6_OE</i>                    | Os03g0402800 | <b>Repressor in JA signaling</b><br>Increased floret number, culm length, and grain weight and reduced heading time and spikelet fertility when overexpressed.<br>Increased number of organs in florets, aberrant patterns of organ formation, and repetitious organ production in spikelets when overexpressed in the dominant negative form. | [44,45]     |
| <i>OsJAZ7</i>  | <i>OsJAZ7_OE</i>                    | Os07g0615200 | <b>Repressor in JA signaling</b><br>Increased floret number, culm length, grain weight, and heading time when overexpressed.<br>Increased number of organs in florets, aberrant patterns of organ formation, and repetitious organ production in spikelets when overexpressed in the dominant negative form.                                   | [44,45]     |
| <i>OsJAZ8</i>  | <i>OsJAZ8_OE</i><br><i>OsJAZ8AC</i> | Os09g0439200 | <b>Repressor in JA signaling</b><br>Increased floret number and culm length; reduced heading time, spikelet fertility, and grain weight when overexpressed.<br>Insensitive to JA treatment and loses JA-induced resistance to <i>Xanthomonas oryzae</i> pv <i>oryzae</i> when overexpressed in the dominant negative form.                     | [45,57]     |
| <i>OsJAZ9</i>  | <i>OsJAZ9_OE</i><br><i>osjaz9</i>   | Os03g0180800 | <b>Repressor in JA signaling</b><br>Increased floret number, culm length, and grain weight; reduced heading time and spikelet fertility and increased salt tolerance when overexpressed.<br>Increases susceptibility to salt stress when mutated.                                                                                              | [10,45,102] |
| <i>OsJAZ10</i> | <i>OsJAZ10_OE</i>                   | Os03g0181100 | <b>Repressor in JA signaling</b><br>Increased floret number, culm length, and grain weight; reduced heading time and spikelet fertility when overexpressed.                                                                                                                                                                                    | [45]        |
| <i>OsJAZ11</i> | <i>OsJAZ11_OE</i>                   | Os03g0180900 | <b>Repressor in JA signaling</b><br>Increased floret number, culm length, and grain weight; a reduced number of days to flowering and spikelet fertility when overexpressed.                                                                                                                                                                   | [44,45]     |

|                 |                                       |              |                                                                                                                                                                                                                                                                                                                                              |               |
|-----------------|---------------------------------------|--------------|----------------------------------------------------------------------------------------------------------------------------------------------------------------------------------------------------------------------------------------------------------------------------------------------------------------------------------------------|---------------|
|                 |                                       |              | Increased number of organs in florets, aberrant patterns of organ formation, and repetitious organ production in spikelets when overexpressed in the dominant negative form.                                                                                                                                                                 |               |
| <i>OsJAZ12</i>  | <i>OsJAZ12_OE</i>                     | Os10g0392400 | <b>Repressor in JA signaling</b><br>Increased floret number, culm length, and grain weight; reduced number of days to flowering and spikelet fertility when overexpressed.                                                                                                                                                                   | [45]          |
| <i>OsJAZ13</i>  | <i>OsJAZ13_OE</i>                     | Os10g0391400 | <b>Repressor in JA signaling</b><br>Increased floret number; reduced number of days to flowering, grain weight, culm length, and spikelet fertility when overexpressed.                                                                                                                                                                      | [45]          |
| <i>OsCO11a</i>  | <i>oscoi1aRNAi</i>                    | Os01g0853400 | <b>Receptor of JA-Ile</b><br>Increased plant height and grain length and increased susceptibility to the rice leaf folder (LF) <i>Cnaphalocrocis medinalis</i> and the Rice black streaked dwarf virus (RBSDV) when silenced.                                                                                                                | [39,63,75–41] |
| <i>OsCO11b</i>  | <i>oscoi1b</i>                        | Os05g0449500 | <b>Receptor of JA-Ile</b><br>Delays leaf senescence and reduces fertility and grain filling rate when mutated.<br>Increases plant height and grain length and increases susceptibility to the Rice black streaked dwarf virus (RBSDV) when silenced.                                                                                         | [39,40,75]    |
| <i>OsNINJA1</i> | <i>OsNINJA1_OE</i>                    | Os05g0558800 | <b>Component of a corepressor complex and connects JAZ and NINJA proteins in JA signaling</b><br>Increases susceptibility to the bacterial blight disease caused by <i>Xanthomonas oryzae</i> pv <i>oryzae</i> , and delays leaf senescence when overexpressed.                                                                              | [47]          |
| <i>OsMYC2</i>   | <i>OsMYC2_OE</i><br><i>osmyc2RNAi</i> | Os10g0575000 | <b>Activator of a transcription factor in JA signaling</b><br>Regulates senescence-associated genes, inhibits seedling growth, and increases resistance to <i>Xanthomonas oryzae</i> pv <i>oryzae</i> when overexpressed.<br>Reduces expression of JA-responsive genes when silenced.                                                        | [48, 53]      |
| <i>OsRSS3</i>   | <i>rss3 (rice salt sensitive 3)</i>   | Os11g0446000 | <i>RSS3</i> 's function is required for root cell elongation and the control of root growth under salinity conditions. A loss of function of <i>RSS3</i> moderately inhibits cell elongation under normal conditions, but it provokes spontaneous root cell swelling, accompanied by severe root growth inhibition, under saline conditions. | [1056]        |
